# Supplementary material
Source: Springer Nature journal article supplement (https://www.springermedizin.de/resource/supplementary/12872_2014_755_MOESM3_ESM.pdf/9430426)

FR 61Hz  
10cm

2D  
74%  
C 45  
P Off  
Ris

- ✦ Dist 0.350 cm
- ✕ Dist 0.192 cm
- ◇ Dist 0.063 cm
- ✧ Dist 0.055 cm

M3

P

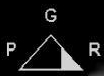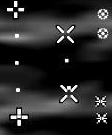

L 119  
W 153  
\*\*\*bpm

Supplement: MOESM3 [file 9430426]
